# Supplementary material for: RyR2 disease mutations at the C-terminal domain intersubunit interface alter closed-state stability and channel activation
Source: PubMed Central journal article supplement — J Biol Chem. 2021 May 20;297(1):100808. doi: 10.1016/j.jbc.2021.100808 (PMC8214192; doi:10.1016/j.jbc.2021.100808), 2021-05-20
Supplement: mmc1.pdf [file mmc1.pdf]

**Supporting Information for:**

**RyR2 Disease Mutations at the C-terminal Domain Inter-subunit Interface Alter Closed-state Stability and Channel Activation**

Wenting Guo<sup>a,1</sup>, Jinhong Wei<sup>b,1</sup>, John Paul Estillo<sup>1</sup>, Lin Zhang<sup>1</sup>, Ruiwu Wang<sup>1</sup>, Bo Sun<sup>c,\*,1,2</sup>, and S. R. Wayne Chen<sup>d,\*,1</sup>

**Supplementary Figure 1**

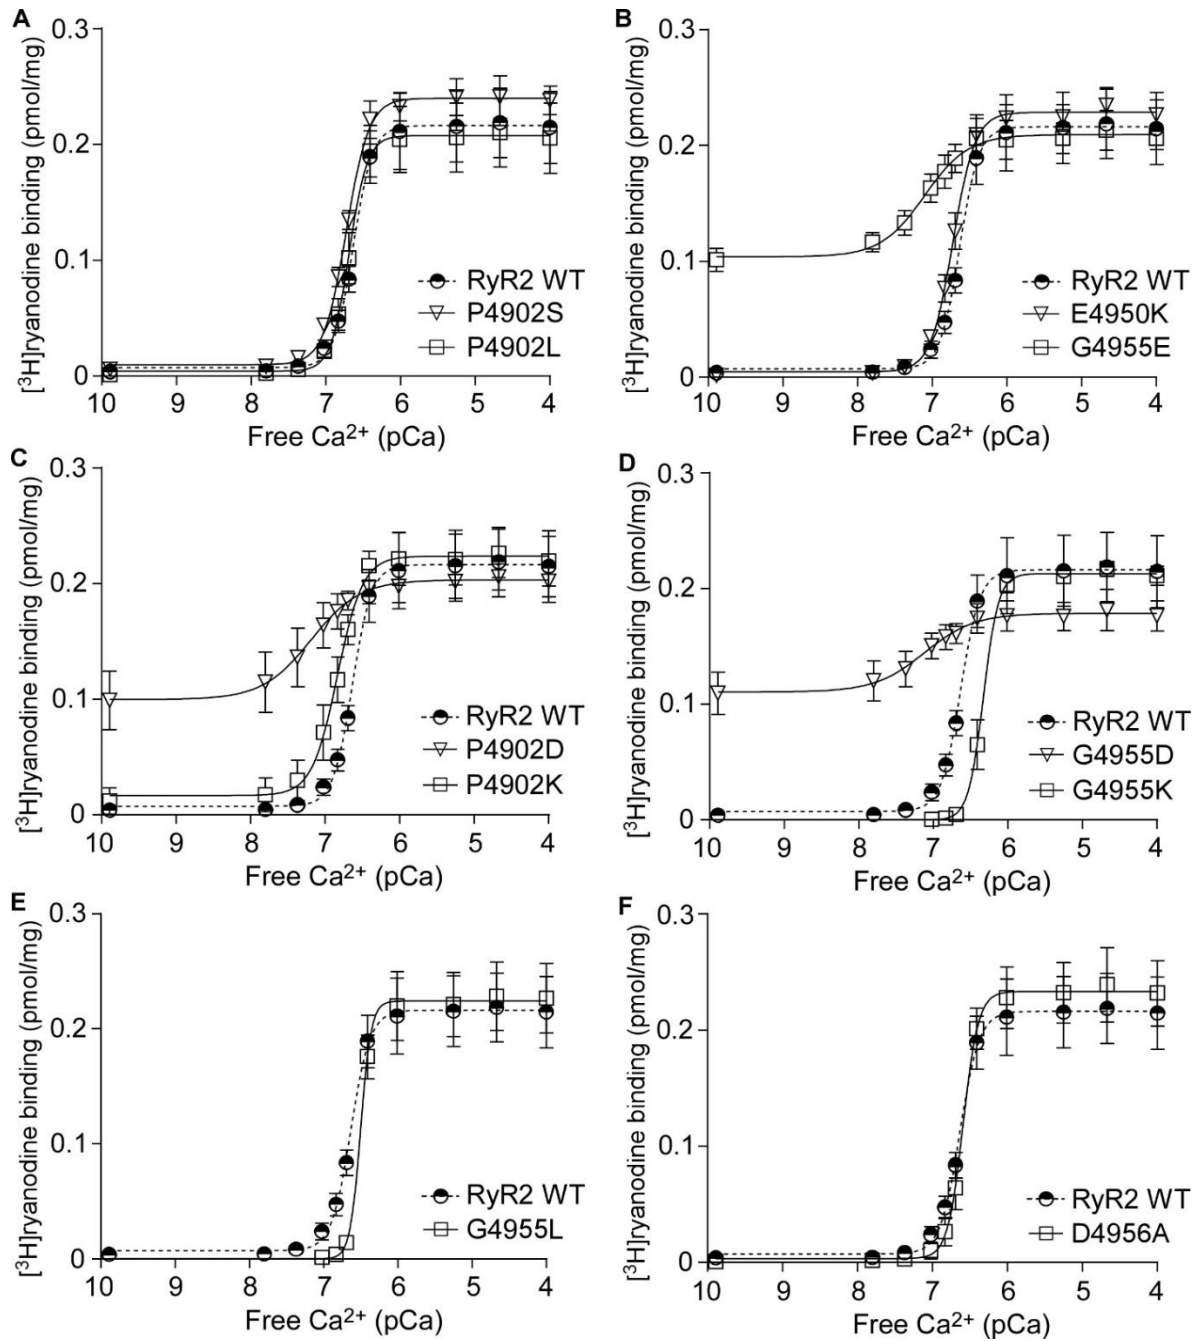

**Supplementary Figure 1. Effects of CTD mutations on  $[^3\text{H}]$ ryanodine binding to RyR2.**  $[^3\text{H}]$ ryanodine binding to cell lysate prepared from HEK293 cells transiently transfected with the RyR2 WT or CTD mutant cDNAs was carried out at various  $\text{Ca}^{2+}$  concentrations (0.1 nM to 0.1 mM).  $[^3\text{H}]$ ryanodine binding (shown in pmol/mg) to RyR2 WT, P4902S, P4902L (A), to RyR2 WT, E4950K, G4955E (B), to RyR2 WT, P4902D, P4902K (C), to RyR2 WT, G4955D, G4955K (D), to RyR2 WT, G4955L (E), or to RyR2 WT, D4956A (F). The same sets of  $[^3\text{H}]$ ryanodine binding data (shown in percentage (%) of the maximum binding) can be found in Figs. 2 and 7.

**Supplementary Figure 2**

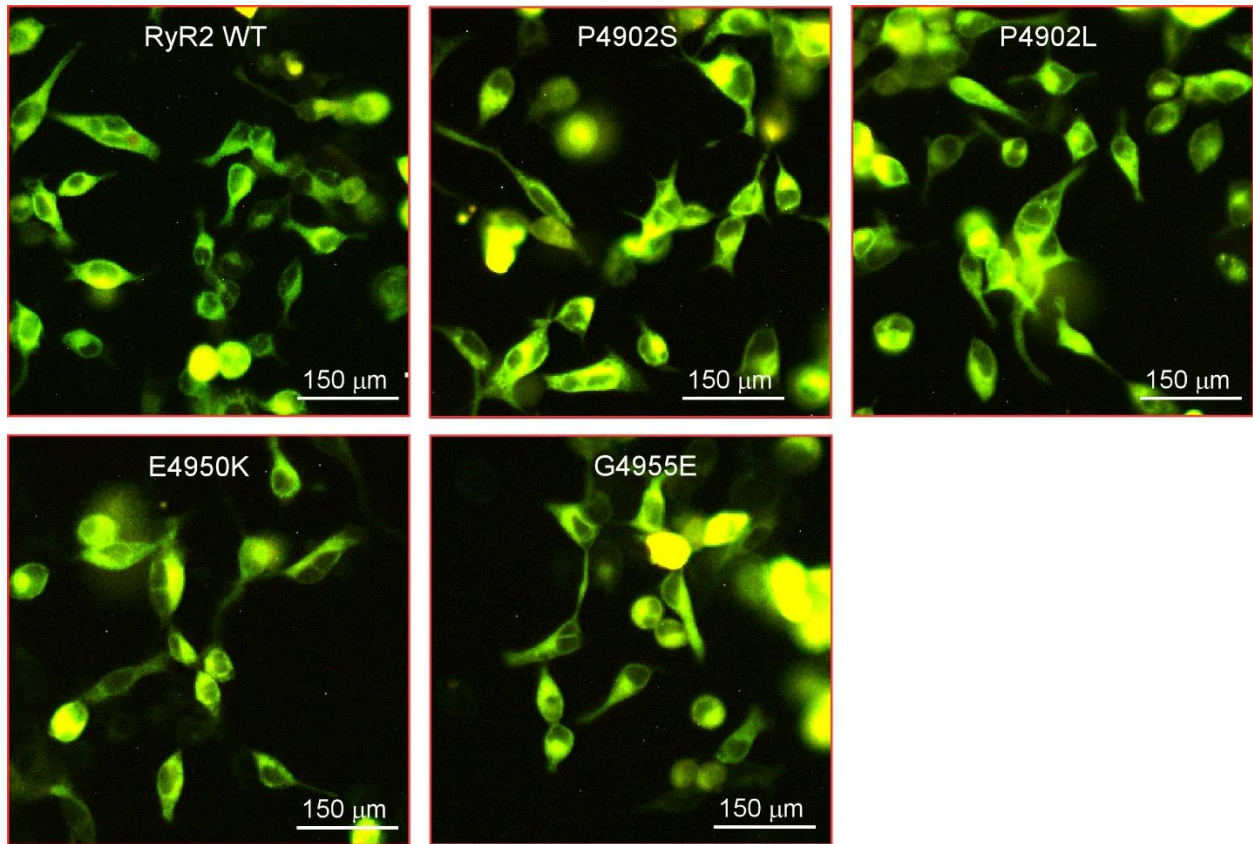

**Supplementary Figure 2. Representative images of FRET-based D1ER imaging of HEK293 cells**

Stable, inducible HEK293 cell lines expressing RyR2 WT and mutants were transfected with the FRET-based ER luminal  $\text{Ca}^{2+}$ -sensing protein D1ER. Representative images of D1ER protein fluorescence (YFP/CFP) of RyR2 WT, P4902S, P4902L, E4950K, and G4955E expressing HEK293 cells in the presence of 2 mM extracellular  $\text{Ca}^{2+}$  concentration.
